# Supplementary material for: Ag, Ge dual-gradient substitution for low-energy loss and high-efficiency kesterite solar cells
Source: Royal Society of Chemistry journal article supplement (doi:10.1039/d0ta06318e), 2020-01-01
Supplement: d0ta06318e1.pdf [file d0ta06318e1.pdf]

## **Ag, Ge dual gradient substitution for Low-Energy Loss and High Efficiency Kesterite Solar Cells**

Junjie Fu, Dongxing Kou\*, Wenhui Zhou, Zhengji Zhou, Shengjie Yuan, Yafang Qi, and Sixin Wu\*

*Key Lab for Special Functional Materials, Ministry of Education, National & Local Joint Engineering Research Center for High-Efficiency Display and Lighting Technology, School of Materials Science and Engineering, Collaborative Innovation Center of Nano Functional Materials and Applications, Henan University, Kaifeng 475004, China.*

*E-mail: koudongxing@henu.edu.cn; wusixin@henu.edu.cn.*

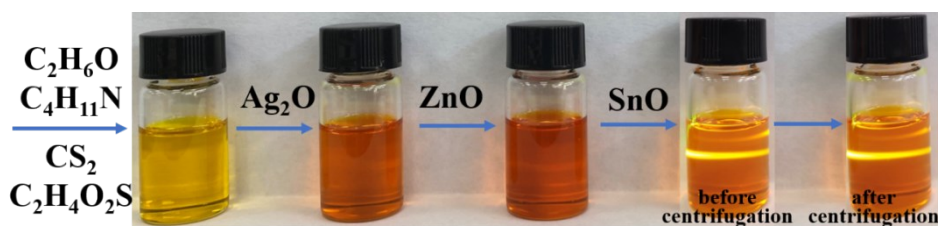

**Fig. S1** The typical operation procedures for the preparation of AZTS precursor solution.

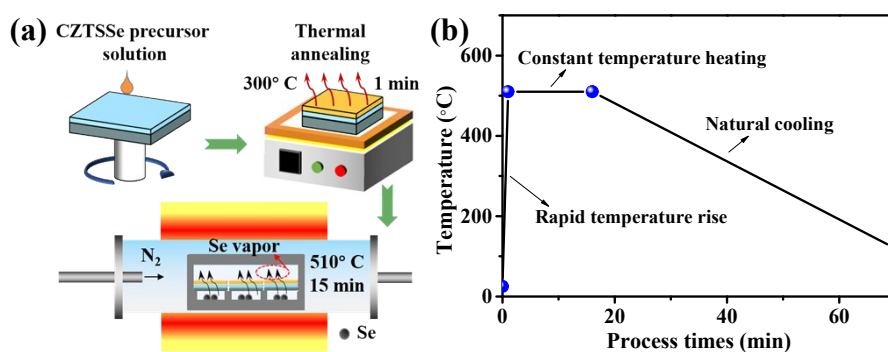

**Fig. S2** (a) Schematic diagram of annealing procedure for selenized CZTSSe films and (b) the corresponding temperature duration of each step.

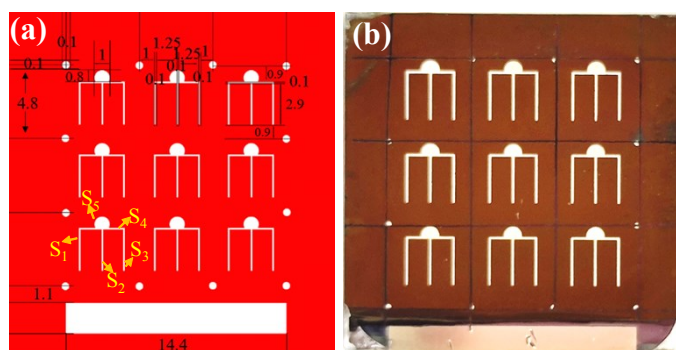

**Fig. S3** (a) Template drawings and (b) digital photograph of the fabricated CZTSSe solar cells. The unit in (a) is mm and the total area of the solar cell is  $0.2304 \text{ cm}^2$ . After minus the silver grid area of  $S_1$  ( $0.0029 \text{ cm}^2$ ),  $S_2$  ( $0.0029 \text{ cm}^2$ ),  $S_3$  ( $0.0029 \text{ cm}^2$ ),  $S_4$  ( $0.0028 \text{ cm}^2$ ) and  $S_5$  ( $0.0068 \text{ cm}^2$ ), the effective area is  $0.2121 \text{ cm}^2$  for the fabricated device.

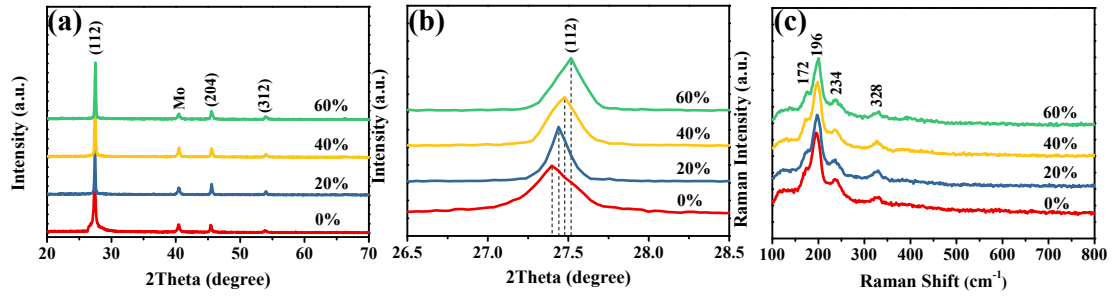

**Fig. S4** (a) X-ray diffraction spectra, (b) enlarged view of the (112) peaks, and (c) Raman spectra of the selenized single Ge gradient CZTSSe thin films with different bottom Ge/(Sn+Ge) ratios.

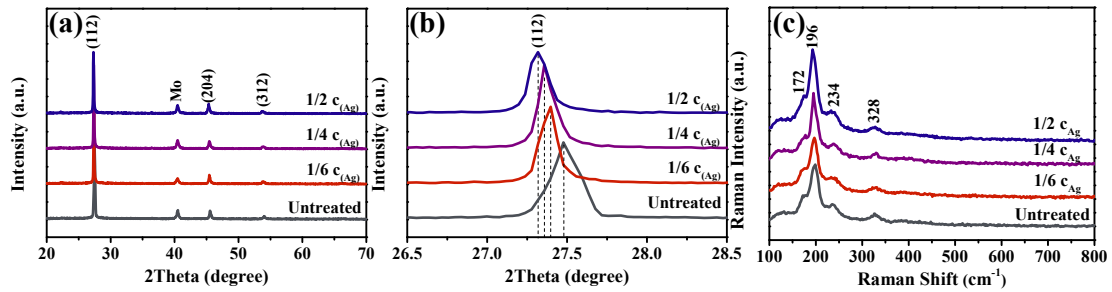

**Fig. S5** (a) X-ray diffraction spectra, (b) enlarged view of the (112) peaks, and (c) Raman spectra for the selenized Ag, Ge dual gradient CZTSSe thin films with different diluted AZTS concentration (untreated, 1/6, 1/4, 1/2 c<sub>Ag</sub>) on top of the 40% Ge gradient CZTSSe films.

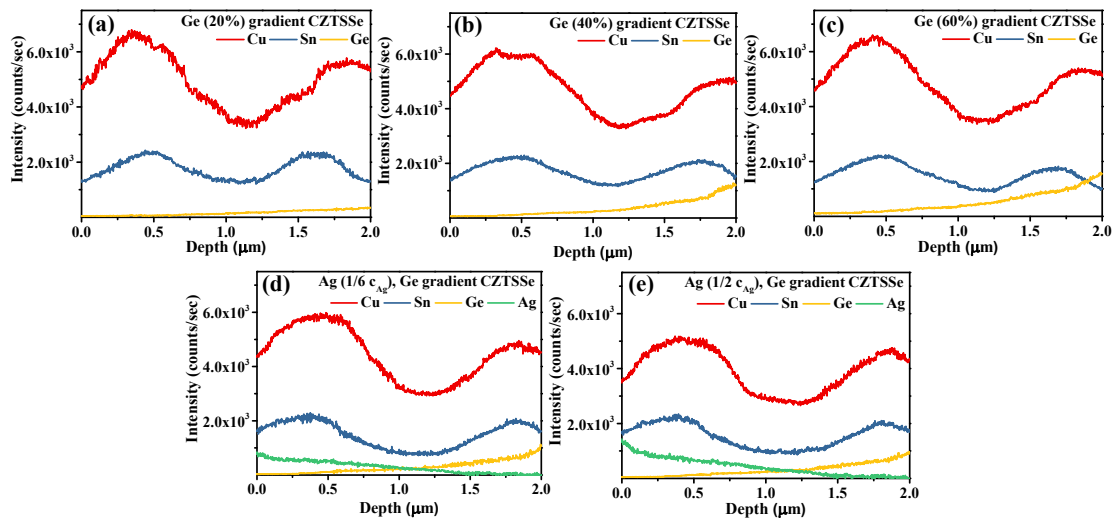

**Fig. S6** SIMS depth profiles of Cu, Sn, Ag and Ge element throughout (a-c) the independent Ge gradient and (d-e) Ag, Ge dual gradient samples with different substitution contents. The scan direction is from surface absorber towards Mo substrate.

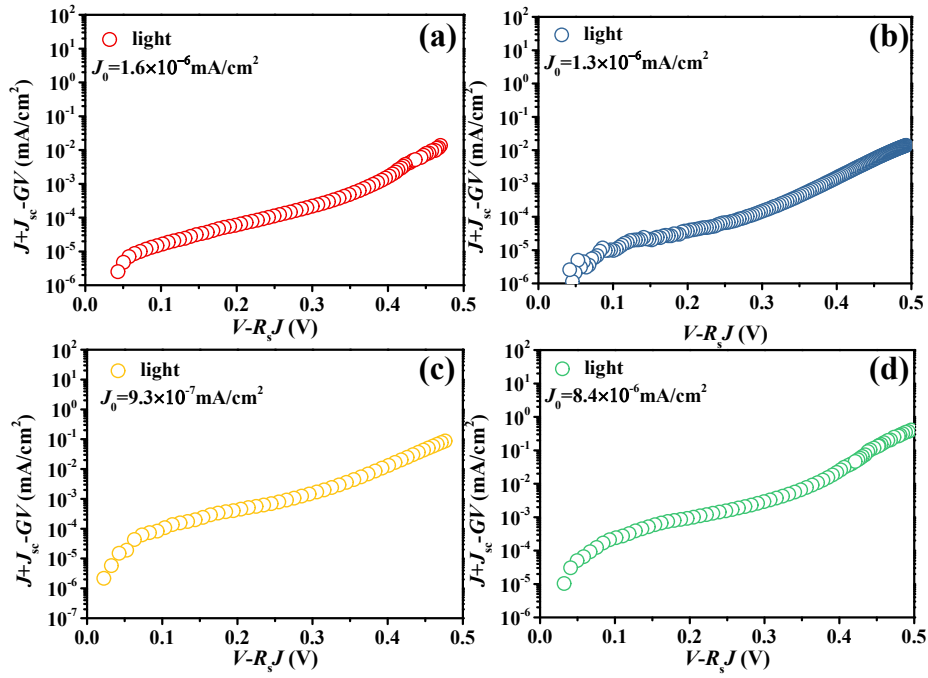

**Fig. S7** Semi-logarithmic plots of  $J+J_{sc}-GV$  vs  $V-R_sJ$  for Ge gradient CZTSSe devices with different Ge/(Ge+Sn) ratio: (a) 0%, (b) 20%, (c) 40%, and (d) 60%.  $J_0$  is obtained from the intercept of linear region.

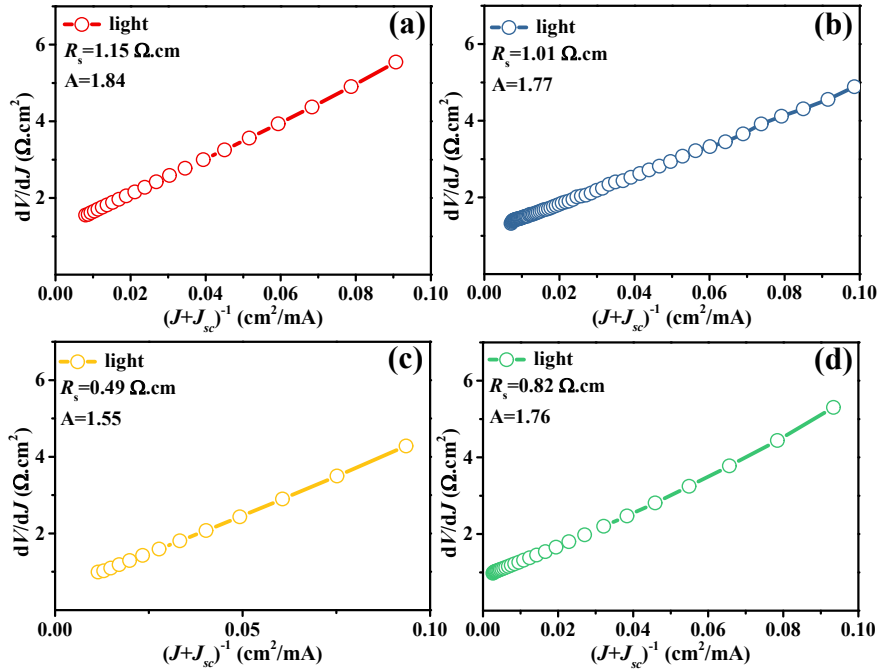

**Fig. S8**  $dV/dJ$  vs  $(J+J_{sc})^{-1}$  curves for Ge gradient CZTSSe devices with different Ge/(Ge+Sn) ratio: (a) 0%, (b) 20%, (c) 40%, and (d) 60%.  $R_s$  is obtained from the intercept of linear region, and the slope is equal to  $AkT/q$ , where  $q/kT=38.7$ .

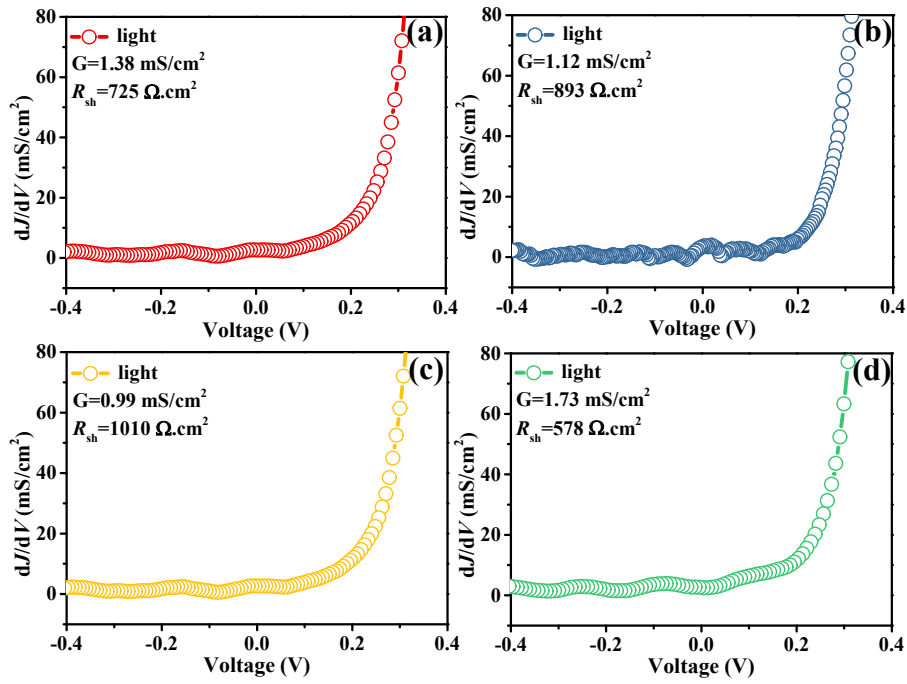

**Fig. S9**  $dJ/dV$  vs  $V$  curves for Ge gradient CZTSSe devices with different Ge/(Ge+Sn) ratio: (a) 0%, (b) 20%, (c) 40%, and (d) 60%.  $G_{sh}$  is evaluated from the average value of plateau range (-0.2~0.2 V), and its reciprocal represents  $R_{sh}$ .

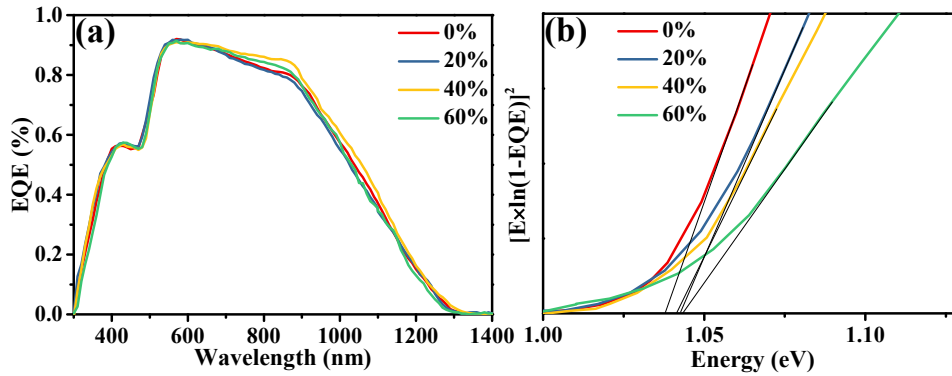

**Fig. S10** (a) EQE curves and (b) the extracted band gap of Ge gradient CZTSSe absorbers with different bottom Ge content.

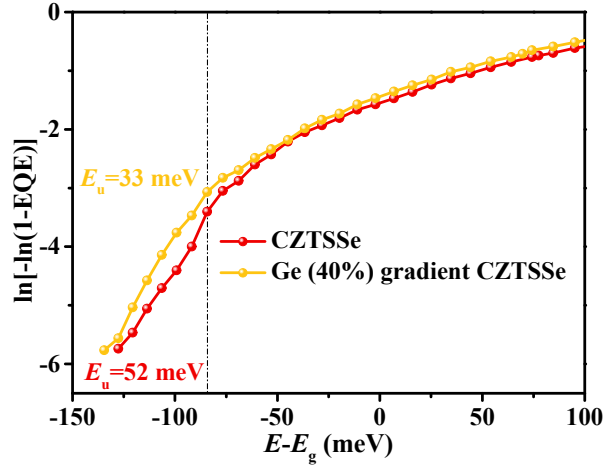

**Fig. S11** Urbach tail energies ( $E_u$ ) extracted from  $\ln[-\ln(1-EQE)]$  vs  $E-E_g$  for the reference and 40% Ge gradient CZTSSe devices

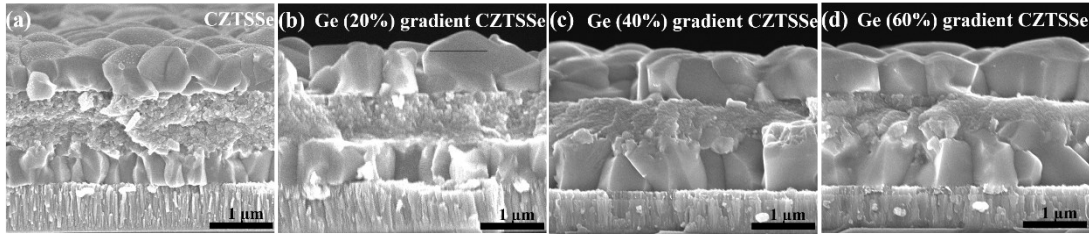

**Fig. S12** The cross-section SEM images of CZTSSe absorber with different Ge substitution content in the bottom layers.

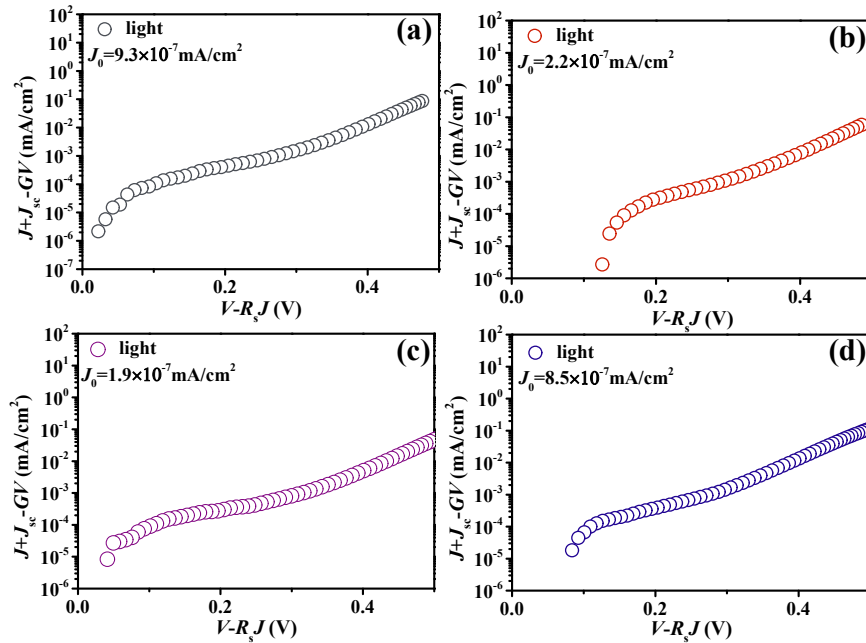

**Fig. S13** Semi-logarithmic plots of  $J+J_{sc}-GV$  vs  $V-R_sJ$  for Ag, Ge dual gradient CZTSSe devices with different diluted AZTS concentration on top of the 40% Ge gradient films: (a) untreated, (b) 1/6, (c) 1/4, and (d) 1/2  $c_{Ag}$ .  $J_0$  is obtained from the intercept of linear region.

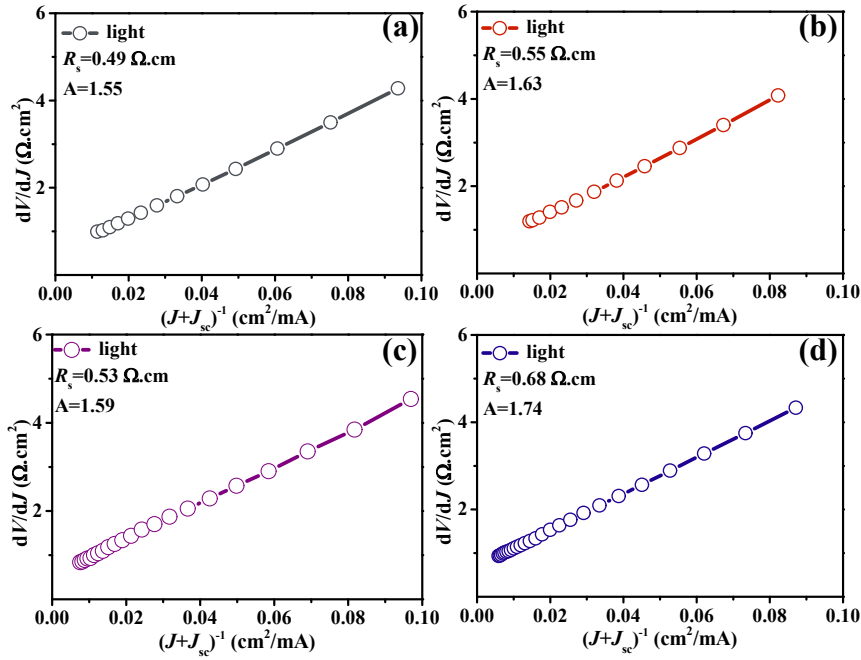

**Fig. S14**  $dV/dJ$  vs  $(J+J_{sc})^{-1}$  curves for Ag, Ge dual gradient CZTSSe devices with different diluted AZTS concentration on top of the 40% Ge gradient films: (a) untreated, (b) 1/6, (c) 1/4, and (d) 1/2  $c_{Ag}$ .  $R_s$  is obtained from the intercept of linear region, and the slope is equal to  $AkT/q$ , where  $q/kT=38.7$ .

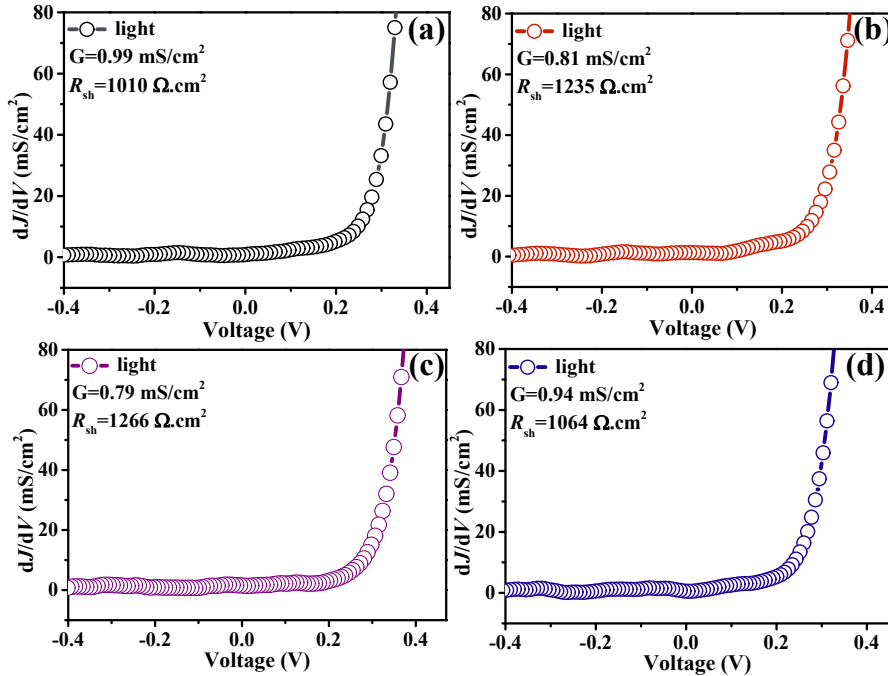

**Fig. S15**  $dJ/dV$  vs  $V$  curves for Ag, Ge dual gradient CZTSSe devices with different diluted AZTS concentration on top of the 40% Ge gradient films: (a) untreated, (b) 1/6, (c) 1/4, and (d) 1/2  $c_{Ag}$ .  $G_{sh}$  is evaluated from the average value of plateau range (-0.2~0.2 V), and its reciprocal represents  $R_{sh}$ .

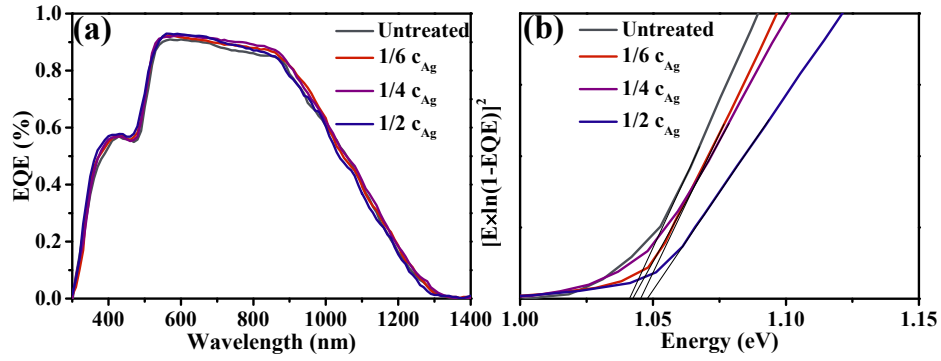

**Fig. S16** (a) EQE curves and (b) the extracted band gap of Ag, Ge dual gradient CZTSSe absorbers with different diluted AZTS concentration on top of the 40% Ge gradient films.

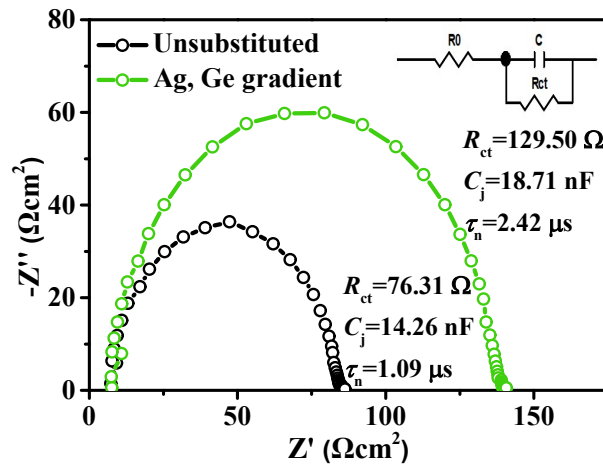

**Fig. S17** EIS Nyquist plots of unsubstituted and Ag, Ge dual gradient CZTSSe solar cells at -0.4 V bias. Insert is the equivalent circuit.

**Table S1** EDX data of the Ge gradient CZTSSe absorbers derived from random selected sites in SEM cross-section.

| Position | S(%)  | Cu(%) | Zn(%) | Ge(%) | Se(%) | Sn(%) | Ge/(Sn+Ge) (%) |
|----------|-------|-------|-------|-------|-------|-------|----------------|
| A        | 8.79  | 19.75 | 13.36 | 0.16  | 48.54 | 9.4   | 1.67           |
| B        | 9.87  | 20.23 | 13.62 | 0.18  | 46.86 | 9.24  | 1.91           |
| C        | 8.45  | 19.89 | 14.82 | 0.35  | 46.56 | 9.93  | 3.39           |
| D        | 9.14  | 18.52 | 13.31 | 0.29  | 49.38 | 9.36  | 3.01           |
| E        | 9.62  | 6.15  | 6.73  | 0.42  | 70.94 | 6.14  | 6.4            |
| F        | 10.34 | 6.32  | 7.59  | 0.45  | 69.48 | 5.82  | 7.18           |
| G        | 8.64  | 17.21 | 13.15 | 1.11  | 52.18 | 7.71  | 12.58          |
| H        | 9.18  | 18.46 | 14.73 | 1.24  | 47.74 | 8.65  | 12.54          |
| I        | 9.69  | 17.71 | 13.27 | 2.25  | 50.07 | 7.01  | 24.3           |
| J        | 8.95  | 17.35 | 13.34 | 2.18  | 51.13 | 6.95  | 23.88          |
